# Supplementary material for: Cataract surgery outcomes in Australia and New Zealand: A retrospective study of outcomes in 5018 cases and review of the literature
Source: Research Square preprint supplement (doi:10.21203/rs.3.rs-2515697/v1), 2023-03-07
Supplement: Supplementary file 1 [file 301e19d7af6984827842f264.docx]

**Supplemental Data:** Published Australian literature on phacoemulsification cataract surgery outcomes. Note that the heterogeneity in reporting visual acuity limits direct comparison.

| First author | State | Eyes (n) | PCR rate (%) | Preoperative vision | Postoperative vision | Other findings |
| --- | --- | --- | --- | --- | --- | --- |
|  | |  |  | **(CDVA unless otherwise stated)** | |  |
| Australia | | | | | | |
| Hewitt, 2001 | Northern Territory | 370 | – | 6/18 or better in 14.7% (Indigenous sample) and 43.7% (non-Indigenous sample) | – | People who were dissatisfied with the cataract surgery were more likely to have poor VA at the time of follow up. |
| Pham, 2004 | New South Wales | 773 | – | 6/12 or better in 28.5% | – | Preoperative ocular comorbidities were present in 36.0% of eyes (n=235). |
| Pager, 2004 | New South Wales | 111 | – | Median: 6/15 | Median: 6/7.5  6/12 or better in over 90% | Those who failed to achieve improvements in satisfaction with vision were more likely to be female, have lower educational attainment or have high visual function preoperatively. |
| Pham, 2007 | New South Wales | 622 | – | – | 6/12 or better in 87.0% | Increasing age and preoperative ocular comorbidities including late ARM, were factors associated with low VF-14 scores and failure of VA improvement. |
| Gothwal, 2010 | South Australia | 51 | – | Mean: 6/18 | Mean: 6/7.5 | – |
| Kanthan, 2011 | New South Wales | 130 | – | – | 6/12 or better in 77% | Uncorrected refractive error and posterior capsular opacification were the main causes of poor vision five and ten years after surgery. |
| Dubey, 2011 | New South Wales | 1812 | 3.4 | Mean: 6/30 | Mean: 6/9  6/12 or better in 92.0% | – |
| Fong, 2012 | New South Wales | 821 | 3.4 | – | 6/12 or better in 87.7% (PHVA) | All major operative complication rates were not significantly different between the consultant and trainee cases (P ≥ 0.07). |
| Kahawita, 2015 | South Australia | 3740 | 2.59 | 6/12 or better in  47.9% | Equivalent or better than preoperative CDVA in 91.4% | Endophthalmitis occurred in four eyes (0.11%). |
| Abell, 2015a | New South Wales | 2228 | 0.22 | – | – | Case series of five senior surgeons.  None of the eyes in which a complication occurred were noted perioperatively to have any risk factors. |
| Ewe, 2015 | New South Wales, Tasmania | 888 | 0.02 | Mean: 6/15 | 6/12 or better in 93.9% | Case series of two senior surgeons |
| Oakley, 2016a | Tasmania | 95 | – | 6/12 or better in 56.8% | 6/12 or better in 85.3% | Case series of single senior surgeon.  All patients had toric lenses inserted. |
| Keel, 2018 | New South Wales, Victoria, Queensland, South Australia, Western Australia, Northern Territory | 1333 | – | – | 6/12 or better in 65.9% of the Indigenous cohort and 88.0% of the non-Indigenous cohort (PHVA) | Refractive error was the leading cause of poor postoperative VA. |
| New Zealand | | | | | | |
| Riley, 2002 | Auckland  (Tāmaki-makau-rau) | 488 | 4.9 | 6/48 | 6/7.5 | One case of endophthalmitis (0.2%) |
| McKelvie, 2015 | Waikato | 541 | 3.3 | 6/48 | – | The mean risk of PCR-VL for Maori patients was higher than European patients at 7.89% for Maori and 4.25% for NZ European patients. |
| Kim, 2016 | Auckland  (Tāmaki-makau-rau) | 498 | 2.6 | 6/30 | 6/9 | There were 42 cases (8.4%) that had an intraoperative complication. There was no significant correlation between having an intraoperative adverse event and a postoperative event (Pearson χ2,P = 0.072). |
| Kim, 2017 | Auckland  (Tāmaki-makau-rau) | 500 | 1.4 | 6/30 | 6/9 | The overall rate of any intraoperative complication was  5.0%. |
| Lam, 2018 | Waikato | 646 | 2.94 | – | – | Waikato patients had significantly higher levels of glaucoma, diabetic retinopathy and brunescent/white cataracts with no fundal view, risk factors which increase the predicted PCR/VL rate compared to the UK Cataract National Ophthalmology Database cohort. |
| Han, 2019 | Auckland  (Tāmaki-makau-rau) | 500 | 0.6 | 6/20 | 6/10 | These results were achieved using the NZCRS prospectively. The overall rate of any intraoperative complication with implementation of the NZCRS was 5.0%. |
| Han, 2019 | Auckland  (Tāmaki-makau-rau) | 500 | 0.8 | 6/20 | 6/10 | Overall, in the current study 3.0% of procedures experienced an intraoperative complication.  In 36.6% of cases in the current study an assisting or supervising surgeon was present and on occasion it was difficult to determine to whom the  complication should be attributed. |
| Newlands, 2019 | Gisborne  (Te Tai Rāwhit) | 205 | 0.5 | 6/38 | 6/7.5 | Māori patients were younger and had significantly worse pre-op CDVA and significantly higher rates of brunescent/white cataract, ‘vitreous opacity/no fundal view’ and diabetic retinopathy. The predicted risk of intraoperative PCR/VL for Māori was significantly higher than NZ European patients. |
| Lu, 2019 | Auckland  (Tāmaki-makau-rau) | 57 | 3.5 | 6/30 | Median 6/12  77.5% of patients  achieving a CDVA of 6/12 or better | Only patients were HZO were analysed. The intraoperative complication rate was 14.0% (8 patients). |

aData taken from the phacoemulsification cohort only.

Abbreviations: CDVA; corrected distance visual acuity, PCR; posterior capsular rupture, PHVA; pin-hole visual acuity, VA; visual acuity.
